# Supplementary material for: The extract of Acanthopanacis Cortex relieves the depression-like behavior and modulates IL-17 signaling in chronic mild stress-induced depressive mice
Source: Research Square preprint supplement (doi:10.21203/rs.3.rs-506080/v1), 2021-05-19
Supplement: Supplementary file 1 [file 00014a8e8c3a1fc4b0861a08.docx]

**Additional file 4.** 120 potential targets

| No | Potential targets |
| --- | --- |
| 1 | SLC6A4 |
| 2 | COMT |
| 3 | DRD2 |
| 4 | TNF |
| 5 | HTR1A |
| 6 | IL6 |
| 7 | NR3C1 |
| 8 | NR3C2 |
| 9 | SLC6A3 |
| 10 | SLC6A2 |
| 11 | CNR1 |
| 12 | PLA2G6 |
| 13 | OPRM1 |
| 14 | GRIK2 |
| 15 | ESR1 |
| 16 | MAOB |
| 17 | CHRM2 |
| 18 | GSK3B |
| 19 | SHH |
| 20 | ABCB1 |
| 21 | CYP2C19 |
| 22 | P2RX7 |
| 23 | GRM2 |
| 24 | APP |
| 25 | GBA |
| 26 | ALB |
| 27 | MAPK1 |
| 28 | CYP1A2 |
| 29 | LRRK2 |
| 30 | RORA |
| 31 | HRAS |
| 32 | TP53 |
| 33 | CYP2C9 |
| 34 | DNMT3B |
| 35 | IL2 |
| 36 | PTPN11 |
| 37 | ADRA2A |
| 38 | PDE4D |
| 39 | GABBR1 |
| 40 | HTR2B |
| 41 | PRKCA |
| 42 | GLUL |
| 43 | OPRD1 |
| 44 | IDO1 |
| 45 | PREP |
| 46 | ADRA1A |
| 47 | ADH1C |
| 48 | SHBG |
| 49 | SCN9A |
| 50 | PIK3CA |
| 51 | ACHE |
| 52 | DHCR7 |
| 53 | TTR |
| 54 | CYP3A4 |
| 55 | MAPK3 |
| 56 | IGF1R |
| 57 | IGFBP3 |
| 58 | TLR4 |
| 59 | F2 |
| 60 | AR |
| 61 | TRPV1 |
| 62 | SCN5A |
| 63 | NOS2 |
| 64 | EDNRA |
| 65 | ADORA2A |
| 66 | MMP9 |
| 67 | TYR |
| 68 | PTGS2 |
| 69 | KDM4C |
| 70 | PLA2G4A |
| 71 | ADORA1 |
| 72 | OPRK1 |
| 73 | FAAH |
| 74 | ALDH2 |
| 75 | SERPINE1 |
| 76 | HSD11B1 |
| 77 | NR1H3 |
| 78 | PPARG |
| 79 | HMGCR |
| 80 | NGFR |
| 81 | STAT3 |
| 82 | KDM6B |
| 83 | SELP |
| 84 | HMOX1 |
| 85 | VDR |
| 86 | MAPK14 |
| 87 | CASP3 |
| 88 | PDE5A |
| 89 | MIF |
| 90 | GAPDH |
| 91 | KCNH2 |
| 92 | ADA |
| 93 | MMP2 |
| 94 | SIGMAR1 |
| 95 | RORB |
| 96 | ESR2 |
| 97 | BACE1 |
| 98 | CYP19A1 |
| 99 | PPM1B |
| 100 | FTO |
| 101 | CYP17A1 |
| 102 | F3 |
| 103 | AGTR1 |
| 104 | PARP1 |
| 105 | PRKCD |
| 106 | BCHE |
| 107 | GRIK3 |
| 108 | CASP8 |
| 109 | MANBA |
| 110 | SELE |
| 111 | FDFT1 |
| 112 | ADAM17 |
| 113 | MMP7 |
| 114 | HRH3 |
| 115 | SERPINA6 |
| 116 | MMP1 |
| 117 | MAPK8 |
| 118 | FOLH1 |
| 119 | PPP2CA |
| 120 | PPARA |
