# Supplementary material for: The extract of Acanthopanacis Cortex relieves the depression-like behavior and modulates IL-17 signaling in chronic mild stress-induced depressive mice
Source: Research Square preprint supplement (doi:10.21203/rs.3.rs-506080/v1), 2021-05-19
Supplement: Supplementary file 3 [file c298ef0b28956be2a9252d58.docx]

**Additional file 3.** 340 targets of identified compounds in Acanthopanacis Cortex

| No | Targets |
| --- | --- |
| 1 | ABCB1 |
| 2 | ABCC1 |
| 3 | ACHE |
| 4 | ACP1 |
| 5 | ADA |
| 6 | ADAM17 |
| 7 | ADAMTS5 |
| 8 | ADH1A |
| 9 | ADH1C |
| 10 | ADK |
| 11 | ADORA1 |
| 12 | ADORA2A |
| 13 | ADORA2B |
| 14 | ADORA3 |
| 15 | ADRA1A |
| 16 | ADRA2A |
| 17 | ADRA2B |
| 18 | ADRA2C |
| 19 | AGTR1 |
| 20 | AHCY |
| 21 | AKR1B1 |
| 22 | AKR1B10 |
| 23 | AKR1C3 |
| 24 | AKR1C4 |
| 25 | ALB |
| 26 | ALDH2 |
| 27 | ALK |
| 28 | ALOX12 |
| 29 | ALOX15 |
| 30 | ALOX5 |
| 31 | APP |
| 32 | AR |
| 33 | ATP12A |
| 34 | BACE1 |
| 35 | BCHE |
| 36 | BCL2L1 |
| 37 | CA1 |
| 38 | CA12 |
| 39 | CA13 |
| 40 | CA14 |
| 41 | CA2 |
| 42 | CA3 |
| 43 | CA4 |
| 44 | CA5A |
| 45 | CA5B |
| 46 | CA6 |
| 47 | CA7 |
| 48 | CA9 |
| 49 | CASP1 |
| 50 | CASP2 |
| 51 | CASP3 |
| 52 | CASP6 |
| 53 | CASP7 |
| 54 | CASP8 |
| 55 | CCND1 |
| 56 | CD22 |
| 57 | CD81 |
| 58 | CDC25A |
| 59 | CDC25B |
| 60 | CDC25C |
| 61 | CDK1 |
| 62 | CDK2 |
| 63 | CEL |
| 64 | CES1 |
| 65 | CES2 |
| 66 | CHRM2 |
| 67 | CHRM4 |
| 68 | CMA1 |
| 69 | CNR1 |
| 70 | COMT |
| 71 | CTBP2 |
| 72 | CTSG |
| 73 | CTSK |
| 74 | CYP11B1 |
| 75 | CYP11B2 |
| 76 | CYP17A1 |
| 77 | CYP19A1 |
| 78 | CYP1A2 |
| 79 | CYP26A1 |
| 80 | CYP26B1 |
| 81 | CYP2C19 |
| 82 | CYP2C9 |
| 83 | CYP3A4 |
| 84 | CYP51A1 |
| 85 | DAGLA |
| 86 | DHCR7 |
| 87 | DNMT3B |
| 88 | DRD2 |
| 89 | ECE1 |
| 90 | EDNRA |
| 91 | EGFR |
| 92 | EGLN1 |
| 93 | ELANE |
| 94 | ENGASE |
| 95 | ENPP2 |
| 96 | EPHX1 |
| 97 | ESR1 |
| 98 | ESR2 |
| 99 | F2 |
| 100 | F3 |
| 101 | FAAH |
| 102 | FABP1 |
| 103 | FABP2 |
| 104 | FABP3 |
| 105 | FABP4 |
| 106 | FABP5 |
| 107 | FDFT1 |
| 108 | FFAR1 |
| 109 | FFAR4 |
| 110 | FLT1 |
| 111 | FLT3 |
| 112 | FNTA |
| 113 | FOLH1 |
| 114 | FTO |
| 115 | FUCA1 |
| 116 | FUT7 |
| 117 | FYN |
| 118 | G6PD |
| 119 | GAA |
| 120 | GABBR1 |
| 121 | GABRA2 |
| 122 | GAPDH |
| 123 | GBA |
| 124 | GCGR |
| 125 | GDA |
| 126 | GLRA1 |
| 127 | GLUL |
| 128 | GPBAR1 |
| 129 | GPR35 |
| 130 | GPR55 |
| 131 | GRIK2 |
| 132 | GRIK3 |
| 133 | GRK1 |
| 134 | GRM2 |
| 135 | GSK3B |
| 136 | HCAR2 |
| 137 | HIF1A |
| 138 | HK1 |
| 139 | HK2 |
| 140 | HMGCR |
| 141 | HMOX1 |
| 142 | HNF4A |
| 143 | HRAS |
| 144 | HRH3 |
| 145 | HRH4 |
| 146 | HSD11B1 |
| 147 | HSD11B2 |
| 148 | HSD17B2 |
| 149 | HSD17B3 |
| 150 | HSPA5 |
| 151 | HSPA8 |
| 152 | HTR1A |
| 153 | HTR2B |
| 154 | IDO1 |
| 155 | IGF1R |
| 156 | IGFBP3 |
| 157 | IL2 |
| 158 | IL6 |
| 159 | IMPDH2 |
| 160 | ITGAL |
| 161 | JAK1 |
| 162 | JAK2 |
| 163 | KCNA5 |
| 164 | KCNH2 |
| 165 | KDM3A |
| 166 | KDM4A |
| 167 | KDM4C |
| 168 | KDM4E |
| 169 | KDM6B |
| 170 | KDR |
| 171 | LCK |
| 172 | LDHA |
| 173 | LDHB |
| 174 | LGALS3 |
| 175 | LGALS9 |
| 176 | LIPE |
| 177 | LRRK2 |
| 178 | LTA4H |
| 179 | LTB4R |
| 180 | MANBA |
| 181 | MAOB |
| 182 | MAPK1 |
| 183 | MAPK14 |
| 184 | MAPK3 |
| 185 | MAPK8 |
| 186 | MAPK9 |
| 187 | MCL1 |
| 188 | MDM2 |
| 189 | MET |
| 190 | MGLL |
| 191 | MIF |
| 192 | MMP1 |
| 193 | MMP12 |
| 194 | MMP13 |
| 195 | MMP2 |
| 196 | MMP3 |
| 197 | MMP7 |
| 198 | MMP8 |
| 199 | MMP9 |
| 200 | NEU2 |
| 201 | NEU3 |
| 202 | NEU4 |
| 203 | NFE2L2 |
| 204 | NGFR |
| 205 | NOS2 |
| 206 | NPC1L1 |
| 207 | NQO2 |
| 208 | NR1H2 |
| 209 | NR1H3 |
| 210 | NR1H4 |
| 211 | NR1I2 |
| 212 | NR1I3 |
| 213 | NR3C1 |
| 214 | NR3C2 |
| 215 | OGA |
| 216 | OPRD1 |
| 217 | OPRK1 |
| 218 | OPRM1 |
| 219 | OXER1 |
| 220 | P2RX7 |
| 221 | PARP1 |
| 222 | PDE1B |
| 223 | PDE4D |
| 224 | PDE5A |
| 225 | PDE7A |
| 226 | PDE9A |
| 227 | PGGT1B |
| 228 | PGR |
| 229 | PIK3CA |
| 230 | PIK3CB |
| 231 | PIM1 |
| 232 | PLA2G1B |
| 233 | PLA2G4A |
| 234 | PLA2G6 |
| 235 | PNP |
| 236 | POLA1 |
| 237 | POLB |
| 238 | PPARA |
| 239 | PPARD |
| 240 | PPARG |
| 241 | PPM1B |
| 242 | PPP1CC |
| 243 | PPP2CA |
| 244 | PPP2R5A |
| 245 | PREP |
| 246 | PRKAG1 |
| 247 | PRKCA |
| 248 | PRKCD |
| 249 | PRKCH |
| 250 | PSEN2 |
| 251 | PTAFR |
| 252 | PTGDR |
| 253 | PTGDR2 |
| 254 | PTGER1 |
| 255 | PTGER2 |
| 256 | PTGER3 |
| 257 | PTGER4 |
| 258 | PTGES |
| 259 | PTGES2 |
| 260 | PTGFR |
| 261 | PTGIR |
| 262 | PTGS1 |
| 263 | PTGS2 |
| 264 | PTPN1 |
| 265 | PTPN11 |
| 266 | PTPN2 |
| 267 | PTPN6 |
| 268 | PTPRF |
| 269 | PYGL |
| 270 | PYGM |
| 271 | QPCT |
| 272 | RARA |
| 273 | RARB |
| 274 | RARG |
| 275 | RBP4 |
| 276 | RORA |
| 277 | RORB |
| 278 | RORC |
| 279 | RXRA |
| 280 | RXRB |
| 281 | RXRG |
| 282 | S1PR1 |
| 283 | S1PR3 |
| 284 | S1PR4 |
| 285 | S1PR5 |
| 286 | SAE1 |
| 287 | SCD |
| 288 | SCN5A |
| 289 | SCN9A |
| 290 | SELE |
| 291 | SELP |
| 292 | SERPINA6 |
| 293 | SERPINE1 |
| 294 | SHBG |
| 295 | SHH |
| 296 | SIGMAR1 |
| 297 | SLC16A1 |
| 298 | SLC22A12 |
| 299 | SLC28A2 |
| 300 | SLC29A1 |
| 301 | SLC37A4 |
| 302 | SLC5A2 |
| 303 | SLC6A2 |
| 304 | SLC6A3 |
| 305 | SLC6A4 |
| 306 | SOAT1 |
| 307 | SOAT2 |
| 308 | SQLE |
| 309 | SRD5A1 |
| 310 | SRD5A2 |
| 311 | SREBF2 |
| 312 | STAT3 |
| 313 | SYK |
| 314 | TAAR1 |
| 315 | TBXA2R |
| 316 | TBXAS1 |
| 317 | TDP1 |
| 318 | TERT |
| 319 | THRA |
| 320 | THRB |
| 321 | TK1 |
| 322 | TLR4 |
| 323 | TNF |
| 324 | TNNC1 |
| 325 | TOP1 |
| 326 | TOP2A |
| 327 | TP53 |
| 328 | TPMT |
| 329 | TREH |
| 330 | TRPM8 |
| 331 | TRPV1 |
| 332 | TRPV3 |
| 333 | TTR |
| 334 | TYMP |
| 335 | TYMS |
| 336 | TYR |
| 337 | UGT2B7 |
| 338 | VDR |
| 339 | XPO1 |
| 340 | YARS |
