# Supplementary material for: The extract of Acanthopanacis Cortex relieves the depression-like behavior and modulates IL-17 signaling in chronic mild stress-induced depressive mice
Source: Research Square preprint supplement (doi:10.21203/rs.3.rs-506080/v1), 2021-05-19
Supplement: Supplementary file 4 [file d316c73ca7c9e5658c2a3f82.docx]

**Additional file 2.** 91 chemical compounds in Acanthopanacis Cortex

| No | Compound name |
| --- | --- |
| 1 | caffeic acid |
| 2 | 1-caffeoylquinic acid |
| 3 | chlorogenic acid |
| 4 | coumaroylquinic acid |
| 5 | 1,3-dicaffeoylquinic acid |
| 6 | 3,4-dicaffeoylquinic acid |
| 7 | 3,5-dicaffeoylquinic acid |
| 8 | 4,5-dicaffeoylquinic acid |
| 9 | feruloylquinic acid |
| 10 | neochlorogenic acid |
| 11 | protocatechuic acid |
| 12 | coniferin |
| 13 | eleutheroside B |
| 14 | eleutheroside B1 |
| 15 | eleutheroside D |
| 16 | 4-methoxysalicylaldehyde |
| 17 | sesamin |
| 18 | (+)-syringaresinol-*di-O-*β*-*D-glucoside |
| 19 | (+)-syringaresinol-4-O-β-D-glucoside |
| 20 | syringin |
| 21 | camphor |
| 22 | 3-carene |
| 23 | cis-carveol |
| 24 | trans-carveol |
| 25 | carvone |
| 26 | β-caryophyllene |
| 27 | α-cedrene |
| 28 | β-cedrene |
| 29 | cedrol |
| 30 | α-cubebene |
| 31 | α-curcumene |
| 32 | dihydrocurcumene |
| 33 | β-elemene |
| 34 | 8-hydroxy-1,5-mentene |
| 35 | isoborneol |
| 36 | 2-isopropyl-5-methyl-anisole |
| 37 | linalool |
| 38 | p-mentha-1(7)-ene-2-one |
| 39 | myrcene |
| 40 | myrtenol |
| 41 | α-pinene |
| 42 | β-pinene |
| 43 | cis-pinocamphone |
| 44 | pinocarvone |
| 45 | rosin |
| 46 | δ-terpinene |
| 47 | terpinen-4-ol |
| 48 | α-terpineol |
| 49 | valencene |
| 50 | trans-verbenol |
| 51 | verbenone |
| 52 | acanthoic acid |
| 53 | gracilistone A |
| 54 | gracilistone B |
| 55 | gracilistone C |
| 56 | kaurenoic acid |
| 57 | 17,17-dihydroxy-ent-kaur-15-en-19-oic acid |
| 58 | 11,14-dihydroxy-7-oxo-16-devinyl-ent-pimara-8,11,13-trien-17-oic acid |
| 59 | 7,11-dioxo-ent-pimara-8(9),15-dien-19-oic acid |
| 60 | ent-kaur-16-en-19-oic acid |
| 61 | ent-19-hydroxy-kaur-5,16-diene |
| 62 | ent-18-hydroxy-kaur-6-en-19-oic acid |
| 63 | ent-6-hydroxy-pimara-8(9),15-dien-14-oxo-19-carboxylic acid |
| 64 | ent-7,14-dihydroxy-pimara-8(9),15-dien-11-oxo-19-carboxylic acid |
| 65 | ent-7,11-dioxopimara-15-en-19-carboxylic acid |
| 66 | ent-14-hydroxy-pimara-5(6),9(11),15-trien-7-oxo-19-carboxylic acid |
| 67 | ent-kaur-15-en-17,19-dioic acid |
| 68 | ent-14-oxopimara-7(8),15-dien-19-carboxylic acid |
| 69 | ent-7,11,14-trihydroxy-pimara-8(9),15-dien-19-carboxylic acid |
| 70 | 14β,16-epoxy-15α-hydroxy-ent-pimara-8-en-19-oic acid |
| 71 | 17-hydroxy-ent-kaur-15-en-19-oic acid |
| 72 | 17-hydroxy-kaur-15-en-18-oic acid, methyl ester |
| 73 | 7β-hydroxy-(-)pimara-8(14),15-dien-19-oic acid |
| 74 | 14β-hydroxy-(-)-pimara-8,15-dien-19-oic acid |
| 75 | 7α-hydroxy-14-oxo-ent-pimara-8(9),15-dien-19-oic acid |
| 76 | 7-keto-ent-pimara-8,15-dien-19-oic acid |
| 77 | methyl-17-oxo-ent-kaur-15-en-19-oate |
| 78 | 7-oxo-16-devinyl-ent-pimara-8,11,13-trien-17-oic acid |
| 79 | 7-oxo-ent-pimara-8(14),15-dien-19-oic acid |
| 80 | adenosine |
| 81 | arachidic acid |
| 82 | campesterol |
| 83 | hypoxanthine |
| 84 | linoleic acid |
| 85 | linolenic acid |
| 86 | octadecatrienoic acid (all cis-9,12,15) |
| 87 | oleic acid |
| 88 | palmitic acid |
| 89 | β-sitosterol |
| 90 | β-sitosterol glycoside |
| 91 | stigmasterol |
