# Supplementary material for: The extract of Acanthopanacis Cortex relieves the depression-like behavior and modulates IL-17 signaling in chronic mild stress-induced depressive mice
Source: Research Square preprint supplement (doi:10.21203/rs.3.rs-506080/v1), 2021-05-19
Supplement: Supplementary file 6 [file dba31df111b7a566ad81f080.docx]

**Additional file 1.** 1589 targets related to depression

| No. | Disease targets |
| --- | --- |
| 1 | SLC6A4 |
| 2 | BDNF |
| 3 | HTR2A |
| 4 | TPH2 |
| 5 | COMT |
| 6 | DRD2 |
| 7 | TNF |
| 8 | LOC110806262 |
| 9 | FKBP5 |
| 10 | CRH |
| 11 | HTR1A |
| 12 | MTHFR |
| 13 | CACNA1C |
| 14 | PCLO |
| 15 | MAOA |
| 16 | APOE |
| 17 | DRD3 |
| 18 | TH |
| 19 | MAPT |
| 20 | IL6 |
| 21 | AKT1 |
| 22 | PRL |
| 23 | GRIN2A |
| 24 | MAP2K1 |
| 25 | PER3 |
| 26 | KRAS |
| 27 | IL10 |
| 28 | MECP2 |
| 29 | DISC2 |
| 30 | RELN |
| 31 | CRHR1 |
| 32 | PER2 |
| 33 | SNCA |
| 34 | MIR132 |
| 35 | HTR2C |
| 36 | GRIA1 |
| 37 | NR3C1 |
| 38 | CRP |
| 39 | PRKCG |
| 40 | POLG |
| 41 | TPH1 |
| 42 | NR3C2 |
| 43 | ADAM10 |
| 44 | NOS1 |
| 45 | CYP2B6 |
| 46 | DEAF1 |
| 47 | AVP |
| 48 | FMR1 |
| 49 | IL1B |
| 50 | SLC6A3 |
| 51 | GRM1 |
| 52 | POMC |
| 53 | MDD1 |
| 54 | SLC6A2 |
| 55 | MDD2 |
| 56 | FGFR1 |
| 57 | GRIA2 |
| 58 | SOD1 |
| 59 | CREB1 |
| 60 | GNAS |
| 61 | SLC18A2 |
| 62 | DNMT1 |
| 63 | CNR1 |
| 64 | PLA2G6 |
| 65 | OPRM1 |
| 66 | DRD4 |
| 67 | NRXN1 |
| 68 | LEP |
| 69 | GRIN2B |
| 70 | CYP2D6 |
| 71 | C9orf72 |
| 72 | DCTN1 |
| 73 | HTR3A |
| 74 | NPY |
| 75 | CACNA1A |
| 76 | BRAF |
| 77 | XBP1 |
| 78 | NTRK2 |
| 79 | GRIA3 |
| 80 | NR4A2 |
| 81 | WFS1 |
| 82 | GABRA1 |
| 83 | CNTNAP2 |
| 84 | GRIK2 |
| 85 | DAOA |
| 86 | GNRH1 |
| 87 | OXT |
| 88 | GRID2 |
| 89 | IGF1 |
| 90 | HTR1B |
| 91 | PRNP |
| 92 | ACE |
| 93 | GDNF |
| 94 | SST |
| 95 | PSEN1 |
| 96 | NGF |
| 97 | FGFR2 |
| 98 | DAO |
| 99 | GRIN1 |
| 100 | OXTR |
| 101 | DRD1 |
| 102 | GNB3 |
| 103 | PAH |
| 104 | ESR1 |
| 105 | DISC1 |
| 106 | HTT |
| 107 | GFAP |
| 108 | TWNK |
| 109 | MAOB |
| 110 | FGFR3 |
| 111 | COL11A2 |
| 112 | MAP2K2 |
| 113 | GRM5 |
| 114 | GCH1 |
| 115 | COL1A1 |
| 116 | PRKN |
| 117 | HCRT |
| 118 | CHRM2 |
| 119 | CLOCK |
| 120 | GSK3B |
| 121 | TOR1A |
| 122 | FGF8 |
| 123 | COL2A1 |
| 124 | INS |
| 125 | DLG3 |
| 126 | SHANK3 |
| 127 | TARDBP |
| 128 | PICK1 |
| 129 | PRKAR1A |
| 130 | SHH |
| 131 | PARK7 |
| 132 | ABCB1 |
| 133 | VCP |
| 134 | ATP1A3 |
| 135 | CYP2C19 |
| 136 | GAD1 |
| 137 | NR1D1 |
| 138 | ATP13A2 |
| 139 | P2RX7 |
| 140 | NPAS2 |
| 141 | GRN |
| 142 | GRM2 |
| 143 | ATP2A2 |
| 144 | WASHC5 |
| 145 | CHAT |
| 146 | SYN2 |
| 147 | GRM7 |
| 148 | APP |
| 149 | GBA |
| 150 | COL11A1 |
| 151 | GAL |
| 152 | TACR1 |
| 153 | ALB |
| 154 | POU1F1 |
| 155 | SGCE |
| 156 | ALG9 |
| 157 | MAPK1 |
| 158 | NRG1 |
| 159 | VEGFA |
| 160 | CBLN1 |
| 161 | CYP1A2 |
| 162 | SLC1A2 |
| 163 | HLA-DRB1 |
| 164 | LRRK2 |
| 165 | FLNA |
| 166 | HTR1D |
| 167 | DTNBP1 |
| 168 | ITIH3 |
| 169 | RORA |
| 170 | ARSA |
| 171 | HRAS |
| 172 | PINK1 |
| 173 | TBP |
| 174 | SYP |
| 175 | HLA-DQB1 |
| 176 | TP53 |
| 177 | ATXN2 |
| 178 | NF1 |
| 179 | DLG1 |
| 180 | TSPO |
| 181 | GAD2 |
| 182 | KDM6A |
| 183 | DLG4 |
| 184 | CYP2C9 |
| 185 | ARNTL |
| 186 | MTOR |
| 187 | CHMP2B |
| 188 | DNMT3B |
| 189 | DCANP1 |
| 190 | PTEN |
| 191 | FUS |
| 192 | CHD7 |
| 193 | GLI2 |
| 194 | GLI3 |
| 195 | IL2 |
| 196 | GRIA4 |
| 197 | CRY1 |
| 198 | CRY2 |
| 199 | PDLIM5 |
| 200 | ADCYAP1 |
| 201 | MAFD1 |
| 202 | GRIK4 |
| 203 | GRM3 |
| 204 | RAF1 |
| 205 | IDUA |
| 206 | CP |
| 207 | ZNF804A |
| 208 | ANK3 |
| 209 | PAX6 |
| 210 | AVPR1B |
| 211 | TAC1 |
| 212 | TWIST2 |
| 213 | PSAP |
| 214 | PTPN11 |
| 215 | IFNG |
| 216 | KMT2D |
| 217 | SIRT1 |
| 218 | ATXN8OS |
| 219 | MAFD2 |
| 220 | SOX9 |
| 221 | CREBBP |
| 222 | ATRX |
| 223 | ADRA2A |
| 224 | PTH |
| 225 | DBH |
| 226 | XK |
| 227 | INPPL1 |
| 228 | PTCH1 |
| 229 | NFIX |
| 230 | TAF1 |
| 231 | LBR |
| 232 | PANK2 |
| 233 | NTF3 |
| 234 | FLNB |
| 235 | ALX4 |
| 236 | NRAS |
| 237 | HDAC4 |
| 238 | DMD |
| 239 | CRLF1 |
| 240 | DVL3 |
| 241 | CASR |
| 242 | SCN2A |
| 243 | SLC1A3 |
| 244 | KLHL7 |
| 245 | CC2D1A |
| 246 | LEPQTL1 |
| 247 | KMT2A |
| 248 | PDE4D |
| 249 | RUNX2 |
| 250 | CTLA4 |
| 251 | CDKL5 |
| 252 | CXCL8 |
| 253 | BMP2 |
| 254 | GABBR1 |
| 255 | PRODH |
| 256 | GABRG2 |
| 257 | TFAP2A |
| 258 | UCHL1 |
| 259 | CRHBP |
| 260 | STIN2-VNTR |
| 261 | MAFD3 |
| 262 | MAFD4 |
| 263 | MAFD5 |
| 264 | MAFD6 |
| 265 | MAFD8 |
| 266 | MAFD9 |
| 267 | S100B |
| 268 | HLA-DQA1 |
| 269 | STXBP1 |
| 270 | PDYN |
| 271 | ELN |
| 272 | PTH1R |
| 273 | MEF2C |
| 274 | FBN1 |
| 275 | JPH3 |
| 276 | SLC2A1 |
| 277 | PPP2R2B |
| 278 | CLN6 |
| 279 | CRHR2 |
| 280 | PDE11A |
| 281 | TBX1 |
| 282 | HLA-A |
| 283 | SQSTM1 |
| 284 | LRP8 |
| 285 | GLA |
| 286 | MED12 |
| 287 | GHRL |
| 288 | BMPER |
| 289 | SETD5 |
| 290 | FADS1 |
| 291 | GNA11 |
| 292 | RYR1 |
| 293 | GABRB3 |
| 294 | COQ2 |
| 295 | PIK3R1 |
| 296 | HTR2B |
| 297 | MT-CO1 |
| 298 | NOTCH3 |
| 299 | ADAMTS2 |
| 300 | ZBTB24 |
| 301 | FOXG1 |
| 302 | TMEM106B |
| 303 | ZIC2 |
| 304 | TP63 |
| 305 | HFE |
| 306 | IMPA1 |
| 307 | GPR50 |
| 308 | MTNR1A |
| 309 | C19orf12 |
| 310 | ARID1B |
| 311 | HSD17B4 |
| 312 | PON1 |
| 313 | CLIP1 |
| 314 | FA2H |
| 315 | ACAN |
| 316 | TFAP2B |
| 317 | SMARCA4 |
| 318 | TNFRSF1A |
| 319 | TACR3 |
| 320 | PRKCA |
| 321 | ITPR1 |
| 322 | TEF |
| 323 | MED13L |
| 324 | RAB39B |
| 325 | SCN1A |
| 326 | GLUL |
| 327 | ZBTB20 |
| 328 | RERE |
| 329 | SYNE1 |
| 330 | GAP43 |
| 331 | ERBB4 |
| 332 | HSPG2 |
| 333 | CD96 |
| 334 | HDAC6 |
| 335 | EHMT1 |
| 336 | PLOD1 |
| 337 | EP300 |
| 338 | LHPP |
| 339 | RTN4 |
| 340 | GHR |
| 341 | PTPN22 |
| 342 | TMEM216 |
| 343 | OTX2 |
| 344 | IFNA1 |
| 345 | H2AC18 |
| 346 | COL1A2 |
| 347 | CISD2 |
| 348 | OPRD1 |
| 349 | GPC6 |
| 350 | IDO1 |
| 351 | TPO |
| 352 | FOS |
| 353 | PREP |
| 354 | ATXN10 |
| 355 | GPX4 |
| 356 | ADRA1A |
| 357 | GABRD |
| 358 | WAC |
| 359 | CAT |
| 360 | FKBP4 |
| 361 | CHRNA7 |
| 362 | TACR2 |
| 363 | MT-ND1 |
| 364 | ARID2 |
| 365 | PLCB1 |
| 366 | OPN4 |
| 367 | SIN3A |
| 368 | ADNP |
| 369 | SNAP25 |
| 370 | KISS1R |
| 371 | DRD5 |
| 372 | SMPD1 |
| 373 | KCNJ2 |
| 374 | NSD1 |
| 375 | GRIP1 |
| 376 | TCF4 |
| 377 | MT-TK |
| 378 | ADIPOQ |
| 379 | SLC17A5 |
| 380 | GJA1 |
| 381 | PVALB |
| 382 | HCRTR1 |
| 383 | ADH1C |
| 384 | MT-ND5 |
| 385 | FGF20 |
| 386 | SLC26A2 |
| 387 | SMARCB1 |
| 388 | COASY |
| 389 | HMBS |
| 390 | SNCAIP |
| 391 | KISS1 |
| 392 | RET |
| 393 | ACTG1 |
| 394 | PDGFRB |
| 395 | NKX2-5 |
| 396 | RAI1 |
| 397 | SOS1 |
| 398 | NBN |
| 399 | GNAL |
| 400 | STAT1 |
| 401 | GNRHR |
| 402 | RRM2B |
| 403 | SMARCE1 |
| 404 | ROR2 |
| 405 | MAP2 |
| 406 | SHBG |
| 407 | PSEN2 |
| 408 | CALCA |
| 409 | CCK |
| 410 | SERPINA3 |
| 411 | B3GAT3 |
| 412 | TGIF1 |
| 413 | HDAC8 |
| 414 | CASK |
| 415 | GATA1 |
| 416 | FAT4 |
| 417 | TMEM132D |
| 418 | IL2RA |
| 419 | NEK1 |
| 420 | HESX1 |
| 421 | RIPK4 |
| 422 | ATP7B |
| 423 | POGZ |
| 424 | PITX2 |
| 425 | IGFBP1 |
| 426 | TREM2 |
| 427 | STX16 |
| 428 | FZD2 |
| 429 | KAT6B |
| 430 | SCN9A |
| 431 | GSR |
| 432 | DNAJC5 |
| 433 | VPS35 |
| 434 | GPC3 |
| 435 | ATXN3 |
| 436 | RGS4 |
| 437 | IRF6 |
| 438 | OFD1 |
| 439 | CEP290 |
| 440 | LHX4 |
| 441 | HOMER1 |
| 442 | GLB1 |
| 443 | EIF4G1 |
| 444 | EDAR |
| 445 | PRKACA |
| 446 | SLC25A4 |
| 447 | LINC02152 |
| 448 | LINC02153 |
| 449 | PIEZO2 |
| 450 | PIK3CA |
| 451 | RAPSN |
| 452 | TRH |
| 453 | IQSEC2 |
| 454 | TIMELESS |
| 455 | ACHE |
| 456 | TRPV4 |
| 457 | DHCR7 |
| 458 | EMP1 |
| 459 | SMIM30 |
| 460 | LINC01108 |
| 461 | IL4 |
| 462 | HNRNPA1 |
| 463 | ARSG |
| 464 | PDE4B |
| 465 | CPOX |
| 466 | GABRB2 |
| 467 | SHOX |
| 468 | PSAT1 |
| 469 | TBX2 |
| 470 | ACTA1 |
| 471 | MIR155 |
| 472 | PEX6 |
| 473 | SCN8A |
| 474 | CCDC22 |
| 475 | TWIST1 |
| 476 | XYLT1 |
| 477 | CACNA1H |
| 478 | PRDM16 |
| 479 | PROKR2 |
| 480 | WNT5A |
| 481 | DVL1 |
| 482 | SMC3 |
| 483 | DPP4 |
| 484 | TTR |
| 485 | PIGL |
| 486 | CLCF1 |
| 487 | WDR35 |
| 488 | MYOD1 |
| 489 | SOX11 |
| 490 | PCNT |
| 491 | GRIK1 |
| 492 | CBL |
| 493 | SP4 |
| 494 | FOXH1 |
| 495 | PDGFB |
| 496 | USH2A |
| 497 | TBX4 |
| 498 | FAM20C |
| 499 | HCFC1 |
| 500 | GDI1 |
| 501 | KCNQ3 |
| 502 | GABRA2 |
| 503 | EDA |
| 504 | IL18 |
| 505 | MUSK |
| 506 | LRP2 |
| 507 | GIGYF2 |
| 508 | ARSB |
| 509 | PPOX |
| 510 | MC4R |
| 511 | POLG2 |
| 512 | PPARGC1A |
| 513 | CYP3A4 |
| 514 | SETD2 |
| 515 | SLC6A1 |
| 516 | TAC3 |
| 517 | PROK2 |
| 518 | DYNC2H1 |
| 519 | RMRP |
| 520 | IL2RB |
| 521 | PAX3 |
| 522 | CCL2 |
| 523 | SLC25A24 |
| 524 | ATXN1 |
| 525 | MAPK3 |
| 526 | MT-CO3 |
| 527 | PTCHD1 |
| 528 | BRCA2 |
| 529 | IGF1R |
| 530 | BUB1B |
| 531 | SP7 |
| 532 | DLL3 |
| 533 | WDR60 |
| 534 | KIAA0586 |
| 535 | DDC |
| 536 | KCNQ2 |
| 537 | HSPA9 |
| 538 | SOX3 |
| 539 | PROP1 |
| 540 | CHST3 |
| 541 | KDF1 |
| 542 | BDNF-AS |
| 543 | CCBE1 |
| 544 | PMM2 |
| 545 | TALDO1 |
| 546 | SUMF1 |
| 547 | CANT1 |
| 548 | SPAST |
| 549 | GH1 |
| 550 | IGFBP3 |
| 551 | TLR4 |
| 552 | HP |
| 553 | SOX5 |
| 554 | ETFDH |
| 555 | KIAA1109 |
| 556 | CDH23 |
| 557 | LIG4 |
| 558 | F2 |
| 559 | ARAF |
| 560 | HS6ST1 |
| 561 | NSMF |
| 562 | ANOS1 |
| 563 | NSUN2 |
| 564 | SUFU |
| 565 | KCNA1 |
| 566 | IFT52 |
| 567 | GNAO1 |
| 568 | AARS2 |
| 569 | SYNJ1 |
| 570 | JAG1 |
| 571 | AR |
| 572 | TSHB |
| 573 | CD40LG |
| 574 | NPAS3 |
| 575 | PNOC |
| 576 | PDCD1 |
| 577 | HTRA2 |
| 578 | EPM2A |
| 579 | VPS13C |
| 580 | KIF7 |
| 581 | CALB1 |
| 582 | EDARADD |
| 583 | NPC1 |
| 584 | TRPV1 |
| 585 | CUL4B |
| 586 | PEX5 |
| 587 | MARCKS |
| 588 | SORCS2 |
| 589 | DUSP6 |
| 590 | PCDH19 |
| 591 | ACOX1 |
| 592 | HELLS |
| 593 | GNS |
| 594 | CBS |
| 595 | NRGN |
| 596 | BCR |
| 597 | GUSB |
| 598 | CSNK1E |
| 599 | VGF |
| 600 | LMNA |
| 601 | SYN1 |
| 602 | NDUFV2 |
| 603 | RPS6KA3 |
| 604 | HDAC9 |
| 605 | MBD5 |
| 606 | AVPR1A |
| 607 | SOST |
| 608 | EFNB1 |
| 609 | SKI |
| 610 | SCN5A |
| 611 | MIR137 |
| 612 | EYA1 |
| 613 | PEX7 |
| 614 | WDR34 |
| 615 | PEX10 |
| 616 | TSC2 |
| 617 | ENSG00000277767 |
| 618 | IL1RN |
| 619 | HLA-B |
| 620 | NOS2 |
| 621 | BMP4 |
| 622 | WDR26 |
| 623 | SLC6A9 |
| 624 | GABRA5 |
| 625 | TBK1 |
| 626 | PODXL |
| 627 | DNAJC6 |
| 628 | MT-TL1 |
| 629 | CSF1R |
| 630 | LMNB1 |
| 631 | CC2D2A |
| 632 | FAS |
| 633 | UBE3B |
| 634 | SLC1A1 |
| 635 | GLIS3 |
| 636 | ACSL4 |
| 637 | IFT80 |
| 638 | EDNRA |
| 639 | PPT1 |
| 640 | WASHC4 |
| 641 | TMEM231 |
| 642 | MRE11 |
| 643 | SLC17A7 |
| 644 | NALCN |
| 645 | NCAM1 |
| 646 | CALR |
| 647 | EGF |
| 648 | CSMD1 |
| 649 | UBE2L3 |
| 650 | ARID1A |
| 651 | DPF2 |
| 652 | CEP57 |
| 653 | ADORA2A |
| 654 | NTF4 |
| 655 | TUBB |
| 656 | USP8 |
| 657 | INSR |
| 658 | LFNG |
| 659 | MMP9 |
| 660 | ALG13 |
| 661 | CLCN4 |
| 662 | MT-ND6 |
| 663 | KCNT1 |
| 664 | USH1C |
| 665 | KCTD17 |
| 666 | DNAJC13 |
| 667 | ARMC5 |
| 668 | ACTB |
| 669 | PIGP |
| 670 | CTU2 |
| 671 | PAX1 |
| 672 | AGTR2 |
| 673 | IMPA2 |
| 674 | ATP6V0A2 |
| 675 | FGF17 |
| 676 | SPRY4 |
| 677 | TMEM107 |
| 678 | WDR11 |
| 679 | EZH2 |
| 680 | ERF |
| 681 | AIP |
| 682 | RPGRIP1L |
| 683 | CACNB2 |
| 684 | BMPR1A |
| 685 | ARL3 |
| 686 | ICAM1 |
| 687 | SNCB |
| 688 | TGFB1 |
| 689 | DYNC2LI1 |
| 690 | AHDC1 |
| 691 | PYY |
| 692 | GGT1 |
| 693 | NDUFS4 |
| 694 | LINC02694 |
| 695 | PEX26 |
| 696 | BCL2A1 |
| 697 | TMEM67 |
| 698 | PTS |
| 699 | SLC45A1 |
| 700 | SMC1A |
| 701 | NIPBL |
| 702 | GPC4 |
| 703 | CUL7 |
| 704 | PIGY |
| 705 | MLH1 |
| 706 | CYP27A1 |
| 707 | NCAN |
| 708 | DICER1 |
| 709 | TYR |
| 710 | SHANK2 |
| 711 | CD4 |
| 712 | IL17A |
| 713 | MSH2 |
| 714 | TF |
| 715 | RAB23 |
| 716 | MAG |
| 717 | EDN1 |
| 718 | PTGS2 |
| 719 | MAN2B1 |
| 720 | CHCHD10 |
| 721 | CRKL |
| 722 | PSENEN |
| 723 | KDM4C |
| 724 | SOD2 |
| 725 | SLC1A4 |
| 726 | MIR433 |
| 727 | PCDH15 |
| 728 | PIGT |
| 729 | TNFAIP3 |
| 730 | DGKH |
| 731 | RPS19 |
| 732 | RPL5 |
| 733 | MKS1 |
| 734 | TCTN2 |
| 735 | CFAP410 |
| 736 | UBQLN2 |
| 737 | NHLRC1 |
| 738 | GLUD2 |
| 739 | PLA2G4A |
| 740 | CNTF |
| 741 | ADORA1 |
| 742 | DPYSL2 |
| 743 | TBCE |
| 744 | OBSL1 |
| 745 | TONSL |
| 746 | OPRK1 |
| 747 | GPT |
| 748 | B3GLCT |
| 749 | SNAP29 |
| 750 | MYCN |
| 751 | BGLAP |
| 752 | INPP1 |
| 753 | ALG3 |
| 754 | ADH1B |
| 755 | USP9X |
| 756 | RFC2 |
| 757 | DOK7 |
| 758 | CLIP2 |
| 759 | NOS3 |
| 760 | KIT |
| 761 | FGF14 |
| 762 | EDA2R |
| 763 | MYO7A |
| 764 | JRK |
| 765 | IL13 |
| 766 | KCNAB2 |
| 767 | MT-ATP6 |
| 768 | TTC9B |
| 769 | NEFL |
| 770 | FOXC1 |
| 771 | IL5 |
| 772 | FKRP |
| 773 | WHRN |
| 774 | CNP |
| 775 | TRIP11 |
| 776 | FTSJ1 |
| 777 | IFT81 |
| 778 | IL1R1 |
| 779 | ZSWIM6 |
| 780 | HSP90B1 |
| 781 | AKT3 |
| 782 | ADAT3 |
| 783 | MYH3 |
| 784 | PPP1R1B |
| 785 | METTL23 |
| 786 | HARS1 |
| 787 | GNAI2 |
| 788 | FAAH |
| 789 | GABRR3 |
| 790 | NEB |
| 791 | EIF2S3 |
| 792 | EFEMP2 |
| 793 | GP1BB |
| 794 | ARVCF |
| 795 | TRIM8 |
| 796 | MEGF8 |
| 797 | INTU |
| 798 | ALDH2 |
| 799 | PLCB4 |
| 800 | LTBP3 |
| 801 | HP1BP3 |
| 802 | LIMK1 |
| 803 | PLCG1 |
| 804 | SMARCC2 |
| 805 | SOX4 |
| 806 | VIP |
| 807 | LIPA |
| 808 | CDKN1C |
| 809 | PREPL |
| 810 | CDK5 |
| 811 | IFT140 |
| 812 | SPECC1L |
| 813 | VCL |
| 814 | RPS27A |
| 815 | TRAF6 |
| 816 | GHRH |
| 817 | CCND2 |
| 818 | SERPINE1 |
| 819 | MID1 |
| 820 | CRIPT |
| 821 | NAGA |
| 822 | B3GALNT2 |
| 823 | GMNN |
| 824 | CSPP1 |
| 825 | NAA10 |
| 826 | RAD21 |
| 827 | HTR7 |
| 828 | IL1A |
| 829 | NPR2 |
| 830 | NEFH |
| 831 | TK2 |
| 832 | ALMS1 |
| 833 | FANCL |
| 834 | PIGQ |
| 835 | PEX1 |
| 836 | HSD11B1 |
| 837 | HNMT |
| 838 | CCL5 |
| 839 | SPP1 |
| 840 | P4HTM |
| 841 | TENM4 |
| 842 | AGER |
| 843 | PEX13 |
| 844 | RAB3GAP1 |
| 845 | CTSF |
| 846 | XPR1 |
| 847 | UNC13A |
| 848 | SEMA3A |
| 849 | RSRC1 |
| 850 | NR1H3 |
| 851 | NXN |
| 852 | MAPRE2 |
| 853 | SCARF2 |
| 854 | PPARG |
| 855 | PPIEL |
| 856 | SMAD4 |
| 857 | HMGCR |
| 858 | NGFR |
| 859 | CLIC2 |
| 860 | CACNG2 |
| 861 | MSH6 |
| 862 | PMS2 |
| 863 | RPL11 |
| 864 | RPL35A |
| 865 | RPS24 |
| 866 | B9D1 |
| 867 | MEN1 |
| 868 | TSHR |
| 869 | CHI3L1 |
| 870 | RTN4R |
| 871 | STAT3 |
| 872 | EIF2AK3 |
| 873 | PHGDH |
| 874 | SCLY |
| 875 | VCAM1 |
| 876 | OCRL |
| 877 | SLC9A7 |
| 878 | PEX12 |
| 879 | PDE4A |
| 880 | PFN1 |
| 881 | OPTN |
| 882 | ABCA7 |
| 883 | AP2S1 |
| 884 | MATR3 |
| 885 | CIB2 |
| 886 | CCNF |
| 887 | USH1G |
| 888 | PDZD7 |
| 889 | CLRN1 |
| 890 | ADGRV1 |
| 891 | FKTN |
| 892 | TLR2 |
| 893 | PEPD |
| 894 | MIR9-1 |
| 895 | CYP1B1 |
| 896 | LOC108684022 |
| 897 | MDGA1 |
| 898 | POR |
| 899 | KDM6B |
| 900 | STAG2 |
| 901 | HUWE1 |
| 902 | TRRAP |
| 903 | MLXIPL |
| 904 | SON |
| 905 | SH3PXD2B |
| 906 | SEPTIN9 |
| 907 | KCNH1 |
| 908 | ABCC9 |
| 909 | ARX |
| 910 | BAZ1B |
| 911 | TFRC |
| 912 | B4GALT7 |
| 913 | PLP1 |
| 914 | CHRNG |
| 915 | TREX1 |
| 916 | NAGS |
| 917 | MIR659 |
| 918 | CDH11 |
| 919 | GABBR2 |
| 920 | SELP |
| 921 | POLE |
| 922 | TSPAN7 |
| 923 | CNOT1 |
| 924 | TCF20 |
| 925 | ZNF81 |
| 926 | PF4 |
| 927 | CACNA1G |
| 928 | HBB |
| 929 | BCL2 |
| 930 | FGF2 |
| 931 | REN |
| 932 | KIF1A |
| 933 | LTA |
| 934 | FOXP2 |
| 935 | CTSD |
| 936 | WDPCP |
| 937 | MT-CO2 |
| 938 | PNKP |
| 939 | GTF2I |
| 940 | GTF2IRD1 |
| 941 | TBL2 |
| 942 | AMMECR1 |
| 943 | HES7 |
| 944 | MESP2 |
| 945 | CYCS |
| 946 | SLC5A7 |
| 947 | NPPB |
| 948 | ERVW-1 |
| 949 | GRIK5 |
| 950 | DGUOK |
| 951 | HMOX1 |
| 952 | TCTN3 |
| 953 | MSTO1 |
| 954 | MAP3K7 |
| 955 | VDR |
| 956 | STAT4 |
| 957 | TGFBR2 |
| 958 | ARC |
| 959 | GRHL3 |
| 960 | MAPK14 |
| 961 | CIT |
| 962 | SLC18A3 |
| 963 | MOG |
| 964 | CHRNA4 |
| 965 | FGF23 |
| 966 | PIK3R2 |
| 967 | SLC3A1 |
| 968 | GNPAT |
| 969 | ANK1 |
| 970 | DOCK6 |
| 971 | FOXL2 |
| 972 | ADGRG6 |
| 973 | CASP3 |
| 974 | APOB |
| 975 | GRK3 |
| 976 | BRAT1 |
| 977 | VAPB |
| 978 | FH |
| 979 | MT-ND4 |
| 980 | IL18R1 |
| 981 | CNTNAP1 |
| 982 | COL18A1 |
| 983 | DHCR24 |
| 984 | EXTL3 |
| 985 | HIRA |
| 986 | SMARCAL1 |
| 987 | COLEC11 |
| 988 | SLC25A22 |
| 989 | RPS23 |
| 990 | JMJD1C |
| 991 | NUP88 |
| 992 | UFD1 |
| 993 | TNFRSF1B |
| 994 | PRKD1 |
| 995 | FIG4 |
| 996 | IDS |
| 997 | PIP4K2A |
| 998 | ABCB7 |
| 999 | DGCR8 |
| 1000 | MBP |
| 1001 | DYNC1H1 |
| 1002 | MYH7 |
| 1003 | RAP1A |
| 1004 | IGF2R |
| 1005 | C4A |
| 1006 | PRMT7 |
| 1007 | PPBP |
| 1008 | PDE5A |
| 1009 | FMO3 |
| 1010 | MIF |
| 1011 | NDEL1 |
| 1012 | MEG3 |
| 1013 | DAOA-AS1 |
| 1014 | CNR2 |
| 1015 | GABRB1 |
| 1016 | FAR1 |
| 1017 | SETX |
| 1018 | YWHAH |
| 1019 | APOD |
| 1020 | CACNG5 |
| 1021 | GLE1 |
| 1022 | LINS1 |
| 1023 | IL1RAPL1 |
| 1024 | SPTAN1 |
| 1025 | ANG |
| 1026 | HTR3B |
| 1027 | CAMKMT |
| 1028 | EPG5 |
| 1029 | MAF |
| 1030 | TRPS1 |
| 1031 | SLC20A2 |
| 1032 | BCS1L |
| 1033 | KCNJ5 |
| 1034 | TPM2 |
| 1035 | KCNN3 |
| 1036 | ULK4 |
| 1037 | ASPM |
| 1038 | ADGRA3 |
| 1039 | MIR133B |
| 1040 | ANKK1 |
| 1041 | FBXO31 |
| 1042 | MIR24-1 |
| 1043 | LMBR1 |
| 1044 | PAK3 |
| 1045 | ADCY10 |
| 1046 | MSX1 |
| 1047 | PIGN |
| 1048 | ANTXR1 |
| 1049 | IARS2 |
| 1050 | SEMA3E |
| 1051 | CAMP |
| 1052 | HTR6 |
| 1053 | GAPDH |
| 1054 | TRAPPC9 |
| 1055 | GSN |
| 1056 | AMACR |
| 1057 | PRPH |
| 1058 | TNIK |
| 1059 | AIMP1 |
| 1060 | TBC1D7 |
| 1061 | FAN1 |
| 1062 | TTC19 |
| 1063 | GPR101 |
| 1064 | SARS1 |
| 1065 | FRRS1L |
| 1066 | MT-TL2 |
| 1067 | RAP1B |
| 1068 | MIR30E |
| 1069 | LIFR |
| 1070 | IRAK1 |
| 1071 | KCNH2 |
| 1072 | ATXN7 |
| 1073 | GADL1 |
| 1074 | HSPA4 |
| 1075 | EPO |
| 1076 | BUB1 |
| 1077 | RPL35 |
| 1078 | RPL18 |
| 1079 | ITGA8 |
| 1080 | B9D2 |
| 1081 | TRIP13 |
| 1082 | ADA |
| 1083 | CAMK2G |
| 1084 | ADM |
| 1085 | FLI1 |
| 1086 | GDF1 |
| 1087 | MMP2 |
| 1088 | TG |
| 1089 | AGL |
| 1090 | EED |
| 1091 | DIS3L2 |
| 1092 | PAM16 |
| 1093 | TMEM94 |
| 1094 | AQP4 |
| 1095 | DISP1 |
| 1096 | SIGMAR1 |
| 1097 | CYP2E1 |
| 1098 | HYAL1 |
| 1099 | RORB |
| 1100 | BTBD16 |
| 1101 | TRANK1 |
| 1102 | AFG1L |
| 1103 | ERDA1 |
| 1104 | CD8A |
| 1105 | ZFPM2 |
| 1106 | TLR3 |
| 1107 | LY86 |
| 1108 | ANKH |
| 1109 | SMARCA2 |
| 1110 | ESR2 |
| 1111 | AIFM1 |
| 1112 | ALDH6A1 |
| 1113 | PIGA |
| 1114 | KIF22 |
| 1115 | HOXB1 |
| 1116 | ZNF41 |
| 1117 | RHOBTB2 |
| 1118 | ZNF711 |
| 1119 | FRMPD4 |
| 1120 | KCNE5 |
| 1121 | CSTB |
| 1122 | CBLIF |
| 1123 | KYNU |
| 1124 | SMOC1 |
| 1125 | BACE1 |
| 1126 | CLCNKB |
| 1127 | PEX2 |
| 1128 | FLII |
| 1129 | FOXP3 |
| 1130 | MIR21 |
| 1131 | APELA |
| 1132 | KRT5 |
| 1133 | IFT43 |
| 1134 | NTS |
| 1135 | SLC38A8 |
| 1136 | LPL |
| 1137 | EEF1AKNMT |
| 1138 | CGA |
| 1139 | HMCN1 |
| 1140 | MFSD8 |
| 1141 | NECTIN1 |
| 1142 | DNM1 |
| 1143 | WAS |
| 1144 | ASCC1 |
| 1145 | FKBP10 |
| 1146 | PIGG |
| 1147 | ADSS1 |
| 1148 | MIR326 |
| 1149 | NTRK1 |
| 1150 | VPS13A |
| 1151 | CYP19A1 |
| 1152 | ERCC6 |
| 1153 | ATN1 |
| 1154 | MAN1B1 |
| 1155 | PPM1B |
| 1156 | SRD5A3 |
| 1157 | CDCA7 |
| 1158 | LONP1 |
| 1159 | PHF21A |
| 1160 | ADAMTS10 |
| 1161 | SIX2 |
| 1162 | SHROOM4 |
| 1163 | SIX3 |
| 1164 | HBA1 |
| 1165 | HBA2 |
| 1166 | RAB3GAP2 |
| 1167 | LTBP2 |
| 1168 | CD40 |
| 1169 | FTO |
| 1170 | VIM |
| 1171 | CCR6 |
| 1172 | LAMP2 |
| 1173 | SCN1B |
| 1174 | SETD1A |
| 1175 | SLITRK1 |
| 1176 | RBFOX3 |
| 1177 | GNAS-AS1 |
| 1178 | MIR29C |
| 1179 | PARK10 |
| 1180 | PARK16 |
| 1181 | PARK12 |
| 1182 | PARK21 |
| 1183 | GRIN2C |
| 1184 | FASLG |
| 1185 | CYP17A1 |
| 1186 | ELP4 |
| 1187 | TTN |
| 1188 | COL9A1 |
| 1189 | VARS1 |
| 1190 | SLC6A15 |
| 1191 | CRYAB |
| 1192 | PDSS1 |
| 1193 | COL9A2 |
| 1194 | DDR2 |
| 1195 | TRIM37 |
| 1196 | GNPTAB |
| 1197 | UPF3B |
| 1198 | RIPPLY2 |
| 1199 | MYMK |
| 1200 | NAGLU |
| 1201 | KIF11 |
| 1202 | CST3 |
| 1203 | SEC24C |
| 1204 | NEUROD2 |
| 1205 | MED25 |
| 1206 | IL6R |
| 1207 | DCPS |
| 1208 | MT-TS1 |
| 1209 | MT-TS2 |
| 1210 | PRDM10 |
| 1211 | F3 |
| 1212 | DYRK1A |
| 1213 | PENK |
| 1214 | SORL1 |
| 1215 | KDM5C |
| 1216 | GLT8D1 |
| 1217 | HLA-C |
| 1218 | BAX |
| 1219 | UBE2A |
| 1220 | EPHA4 |
| 1221 | EPCAM |
| 1222 | IFNB1 |
| 1223 | HSPA1A |
| 1224 | AGTR1 |
| 1225 | TMPO |
| 1226 | MASP1 |
| 1227 | NOTCH1 |
| 1228 | ADRB2 |
| 1229 | MIR146A |
| 1230 | TNNC1 |
| 1231 | SIK1 |
| 1232 | MRAS |
| 1233 | RREB1 |
| 1234 | FREM2 |
| 1235 | FRAS1 |
| 1236 | CILK1 |
| 1237 | SMG9 |
| 1238 | AKR1A1 |
| 1239 | MTR |
| 1240 | M6PR |
| 1241 | AMH |
| 1242 | ATM |
| 1243 | HCN1 |
| 1244 | NPS |
| 1245 | PTPRG |
| 1246 | LMX1B |
| 1247 | CHRNA1 |
| 1248 | CHRND |
| 1249 | CCL3 |
| 1250 | GPHN |
| 1251 | TDO2 |
| 1252 | GATA6 |
| 1253 | SNX14 |
| 1254 | NKX2-6 |
| 1255 | CCL4 |
| 1256 | ANXA5 |
| 1257 | TSC1 |
| 1258 | RBFOX1 |
| 1259 | EIF4E |
| 1260 | GCG |
| 1261 | L1CAM |
| 1262 | ITGAL |
| 1263 | PARP1 |
| 1264 | ST3GAL3 |
| 1265 | RPS20 |
| 1266 | AFG3L2 |
| 1267 | KDM5B |
| 1268 | WARS2 |
| 1269 | DNA2 |
| 1270 | SRPX2 |
| 1271 | PGAP1 |
| 1272 | THOC2 |
| 1273 | PKHD1 |
| 1274 | CEP78 |
| 1275 | C12orf4 |
| 1276 | GDAP2 |
| 1277 | MT-TN |
| 1278 | CPLX2 |
| 1279 | APC |
| 1280 | EHHADH |
| 1281 | PRKCD |
| 1282 | CXCL12 |
| 1283 | ATP7A |
| 1284 | RNU4ATAC |
| 1285 | DLK1 |
| 1286 | EBF1 |
| 1287 | DGCR6 |
| 1288 | CYP21A2 |
| 1289 | BCHE |
| 1290 | POLR3A |
| 1291 | CHRNB2 |
| 1292 | TIMP1 |
| 1293 | GRIK3 |
| 1294 | BICD2 |
| 1295 | PEX14 |
| 1296 | SPR |
| 1297 | RPS26 |
| 1298 | EIF2B2 |
| 1299 | FLG |
| 1300 | THAP1 |
| 1301 | BBS1 |
| 1302 | MIR140 |
| 1303 | LOX |
| 1304 | NLGN1 |
| 1305 | CASP8 |
| 1306 | PRKCE |
| 1307 | AIF1 |
| 1308 | CEP55 |
| 1309 | EZR |
| 1310 | ENO1 |
| 1311 | MOBP |
| 1312 | CHGA |
| 1313 | SLC12A3 |
| 1314 | GATAD2B |
| 1315 | GNAQ |
| 1316 | NEAT1 |
| 1317 | IGF2 |
| 1318 | KARS1 |
| 1319 | CD79A |
| 1320 | PLXND1 |
| 1321 | DGCR2 |
| 1322 | ESS2 |
| 1323 | CASP9 |
| 1324 | DUSP19 |
| 1325 | SORT1 |
| 1326 | TGFB3 |
| 1327 | ABL1 |
| 1328 | FTL |
| 1329 | EEF1A2 |
| 1330 | PEX19 |
| 1331 | PEX3 |
| 1332 | MGP |
| 1333 | PEX11B |
| 1334 | LARP7 |
| 1335 | PEX16 |
| 1336 | SOX10 |
| 1337 | POFUT1 |
| 1338 | HDC |
| 1339 | SCARB2 |
| 1340 | ADAMTS18 |
| 1341 | PRICKLE1 |
| 1342 | MANBA |
| 1343 | DEPDC5 |
| 1344 | NAPB |
| 1345 | MIRLET7D |
| 1346 | DYT15 |
| 1347 | CELIAC2 |
| 1348 | CELIAC5 |
| 1349 | CELIAC10 |
| 1350 | CELIAC11 |
| 1351 | CELIAC12 |
| 1352 | CELIAC13 |
| 1353 | CELIAC6 |
| 1354 | CELIAC7 |
| 1355 | CELIAC8 |
| 1356 | CELIAC9 |
| 1357 | SLC12A6 |
| 1358 | COL6A1 |
| 1359 | COL6A2 |
| 1360 | NTNG1 |
| 1361 | DCAF8 |
| 1362 | NEXMIF |
| 1363 | KITLG |
| 1364 | SELE |
| 1365 | MST1 |
| 1366 | MLH3 |
| 1367 | NOTCH2 |
| 1368 | NOTCH4 |
| 1369 | WASF1 |
| 1370 | CCR5 |
| 1371 | EPRS1 |
| 1372 | ADCYAP1R1 |
| 1373 | PTHLH |
| 1374 | VIPR2 |
| 1375 | BRCA1 |
| 1376 | KNG1 |
| 1377 | MFN2 |
| 1378 | LRRC7 |
| 1379 | SLC35D1 |
| 1380 | ANKRD11 |
| 1381 | USB1 |
| 1382 | BUB3 |
| 1383 | RPS10 |
| 1384 | RPL15 |
| 1385 | RPS15A |
| 1386 | RPS27 |
| 1387 | RPS29 |
| 1388 | RPS17 |
| 1389 | RPL26 |
| 1390 | RPL27 |
| 1391 | RPS7 |
| 1392 | RPS28 |
| 1393 | RPGRIP1 |
| 1394 | TSR2 |
| 1395 | GREB1L |
| 1396 | ADA2 |
| 1397 | LDLR |
| 1398 | ITGAM |
| 1399 | HTR4 |
| 1400 | HRH1 |
| 1401 | IFNAR1 |
| 1402 | FDFT1 |
| 1403 | CXCL10 |
| 1404 | KCNQ1 |
| 1405 | SETBP1 |
| 1406 | CNKSR2 |
| 1407 | DPM1 |
| 1408 | TRIP12 |
| 1409 | WDR4 |
| 1410 | ACTR3C |
| 1411 | TNNI3 |
| 1412 | IAPP |
| 1413 | NRTN |
| 1414 | IL7 |
| 1415 | PNKD |
| 1416 | ARTN |
| 1417 | TTF2 |
| 1418 | IRF1 |
| 1419 | CD28 |
| 1420 | CD80 |
| 1421 | GRIN2D |
| 1422 | REV3L |
| 1423 | SPAG1 |
| 1424 | TGM2 |
| 1425 | ADAM17 |
| 1426 | GNAI3 |
| 1427 | LAMP1 |
| 1428 | SERPINA7 |
| 1429 | GRM8 |
| 1430 | LEPR |
| 1431 | SNCG |
| 1432 | GRM4 |
| 1433 | TBX22 |
| 1434 | TUSC3 |
| 1435 | ATP6V1B2 |
| 1436 | GABRA3 |
| 1437 | GPX1 |
| 1438 | CDK10 |
| 1439 | HECW2 |
| 1440 | MARS2 |
| 1441 | ADAMTS3 |
| 1442 | ARHGEF6 |
| 1443 | MID2 |
| 1444 | ZBTB18 |
| 1445 | TTC37 |
| 1446 | RSPRY1 |
| 1447 | CXorf56 |
| 1448 | USP27X |
| 1449 | APOA1 |
| 1450 | MMP7 |
| 1451 | DNAH8 |
| 1452 | OPA3 |
| 1453 | CD86 |
| 1454 | IL15 |
| 1455 | SP1 |
| 1456 | HRH3 |
| 1457 | TBC1D24 |
| 1458 | AGA |
| 1459 | COG8 |
| 1460 | SYNGAP1 |
| 1461 | LYN |
| 1462 | CCND1 |
| 1463 | MALAT1 |
| 1464 | CDON |
| 1465 | NSD2 |
| 1466 | SERPINA6 |
| 1467 | GATA4 |
| 1468 | AGT |
| 1469 | ZMPSTE24 |
| 1470 | CPN1 |
| 1471 | MMP1 |
| 1472 | MAPK10 |
| 1473 | NTRK3 |
| 1474 | IHH |
| 1475 | WASF2 |
| 1476 | DCTN2 |
| 1477 | MIR22 |
| 1478 | ETS1 |
| 1479 | PAEP |
| 1480 | MPO |
| 1481 | LRP1 |
| 1482 | RAB5A |
| 1483 | GALR1 |
| 1484 | C4B |
| 1485 | AIRE |
| 1486 | GALNS |
| 1487 | CLN3 |
| 1488 | MIR185 |
| 1489 | BHLHE41 |
| 1490 | SLC2A3 |
| 1491 | RASA1 |
| 1492 | GAN |
| 1493 | ITPR3 |
| 1494 | KRT14 |
| 1495 | VWF |
| 1496 | MC2R |
| 1497 | MAPK8 |
| 1498 | PRKDC |
| 1499 | AADAT |
| 1500 | IGFBP2 |
| 1501 | EXT2 |
| 1502 | ETFA |
| 1503 | ETFB |
| 1504 | KREMEN1 |
| 1505 | KCTD1 |
| 1506 | DPH1 |
| 1507 | GTPBP2 |
| 1508 | TOE1 |
| 1509 | DDRGK1 |
| 1510 | MRPS14 |
| 1511 | UQCC2 |
| 1512 | ARSL |
| 1513 | LIF |
| 1514 | CSF2 |
| 1515 | FOLH1 |
| 1516 | GC |
| 1517 | CD38 |
| 1518 | VCAN |
| 1519 | ALX3 |
| 1520 | INPP5E |
| 1521 | FKBP14 |
| 1522 | SCT |
| 1523 | RAB7A |
| 1524 | CFH |
| 1525 | IFNA2 |
| 1526 | PROM1 |
| 1527 | IREB2 |
| 1528 | ENO2 |
| 1529 | EFEMP1 |
| 1530 | SLC18A1 |
| 1531 | CHIT1 |
| 1532 | MAPRE3 |
| 1533 | NPPA |
| 1534 | TBX5 |
| 1535 | CCR4 |
| 1536 | COL4A1 |
| 1537 | KCNB1 |
| 1538 | ALDH1A1 |
| 1539 | BICC1 |
| 1540 | CCDC8 |
| 1541 | CDC42 |
| 1542 | DES |
| 1543 | DMPK |
| 1544 | SOX2 |
| 1545 | RRAS |
| 1546 | FOXE1 |
| 1547 | CSF3 |
| 1548 | B3GALT6 |
| 1549 | PGAP2 |
| 1550 | PPP2CA |
| 1551 | GABRR1 |
| 1552 | GLO1 |
| 1553 | WT1 |
| 1554 | CYLD |
| 1555 | CR2 |
| 1556 | TLR9 |
| 1557 | TPP1 |
| 1558 | HBB-LCR |
| 1559 | SHOC2 |
| 1560 | CRPPA |
| 1561 | IL12B |
| 1562 | ATP1A2 |
| 1563 | DKC1 |
| 1564 | DLL1 |
| 1565 | COL9A3 |
| 1566 | GAS1 |
| 1567 | REST |
| 1568 | CRTAP |
| 1569 | YWHAQ |
| 1570 | SLC12A5 |
| 1571 | SLC16A2 |
| 1572 | KCNK2 |
| 1573 | ARSH |
| 1574 | PITX3 |
| 1575 | SPG11 |
| 1576 | PRRT2 |
| 1577 | MT-TF |
| 1578 | MT-TH |
| 1579 | MT-TQ |
| 1580 | MT-TW |
| 1581 | KALRN |
| 1582 | ADCY8 |
| 1583 | OGG1 |
| 1584 | MYBPC3 |
| 1585 | PPARA |
| 1586 | HSP90AA1 |
| 1587 | FCGR2A |
| 1588 | FEV |
| 1589 | SMAD3 |
