# Supplementary figures and images for: The extract of Acanthopanacis Cortex relieves the depression-like behavior and modulates IL-17 signaling in chronic mild stress-induced depressive mice
Source: Research Square preprint supplement (doi:10.21203/rs.3.rs-506080/v1), 2021-05-19

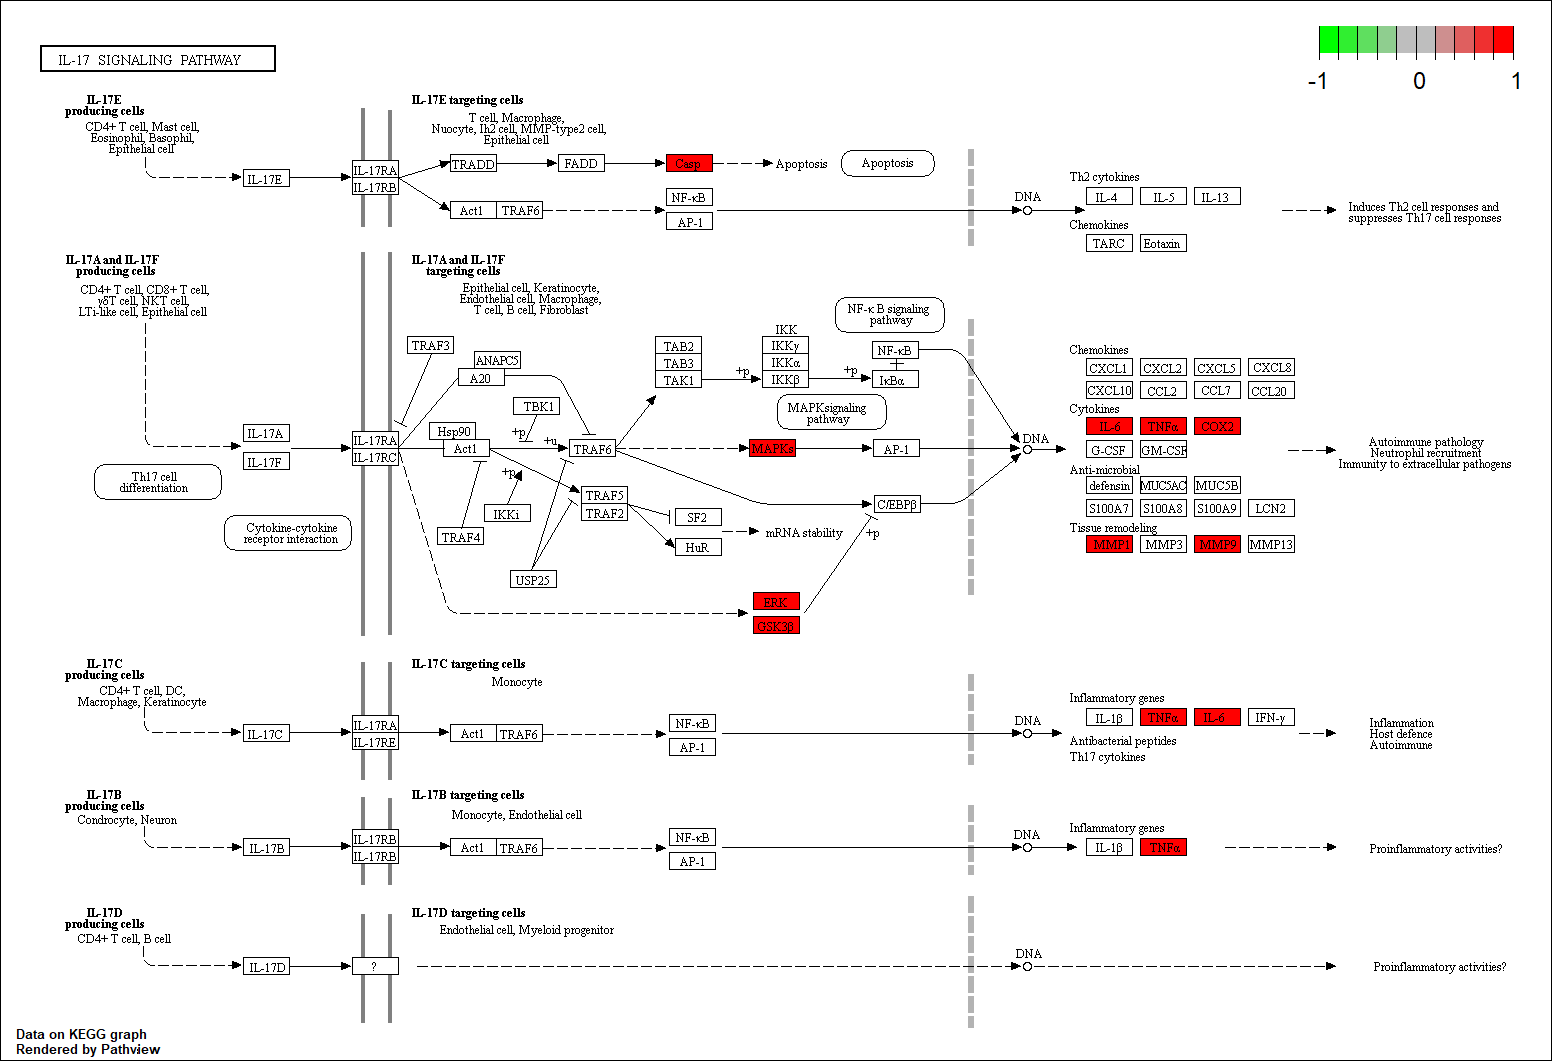


**Additional file 5.** IL-17 signaling pathway in KEGG pathway analysis

Supplement: Supplementary file 2 [file a779e6d4ace4d2d9872c6fd8.docx]
